# Supplementary material for: Tunneling Nanotubes are Novel Cellular Structures That Communicate Signals Between Trabecular Meshwork Cells
Source: PubMed Central journal article supplement — Invest Ophthalmol Vis Sci. 2017 Oct;58(12):5298–307. doi: 10.1167/iovs.17-22732 (PMC5656416; doi:10.1167/iovs.17-22732), 2017-10

**Tunneling nanotubes are novel cellular structures that communicate signals between trabecular meshwork cells**

Kate E. Keller\*, John M. Bradley, Ying Ying Sun, Yong-feng Yang, & Ted S. Acott.

Casey Eye Institute,  
Oregon Health & Science University,  
3181 SW Sam Jackson Park Road,  
Portland, OR 97239.

\* Corresponding author: Kate E. Keller, PhD

**Tel:** 503 494 2366

**Fax:** 503 418 2399

**E-mail:** [gregorka@ohsu.edu](mailto:gregorka@ohsu.edu)

Figure S1a

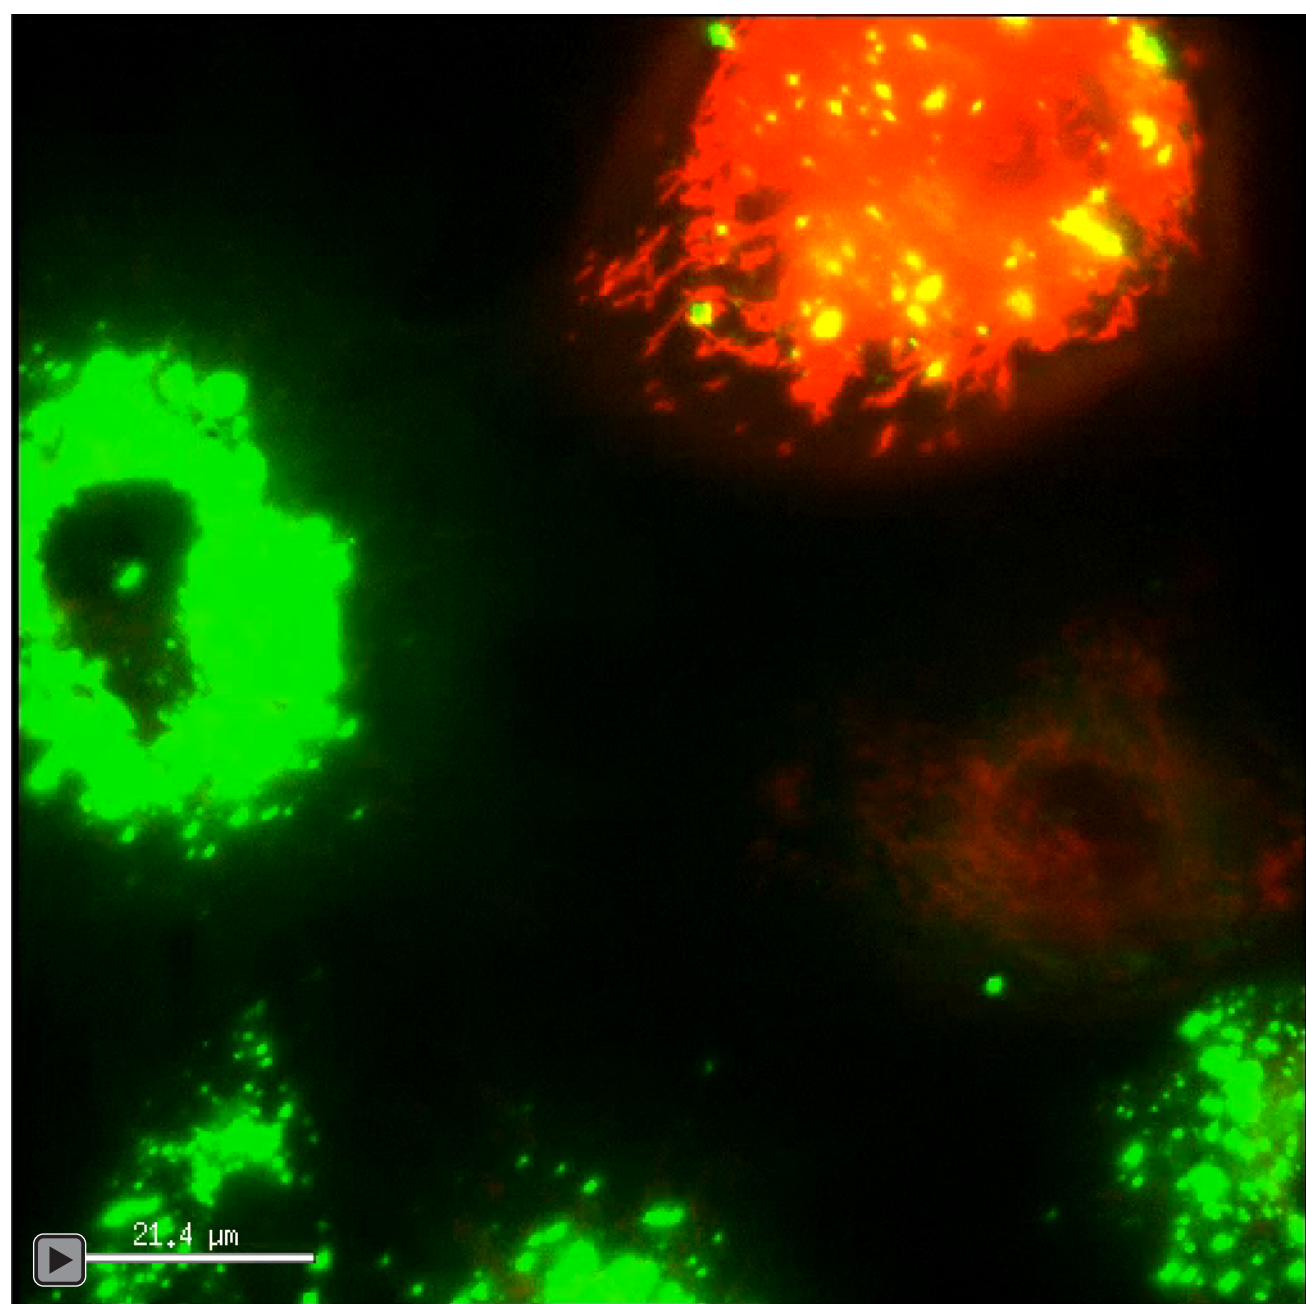

Figure S1b

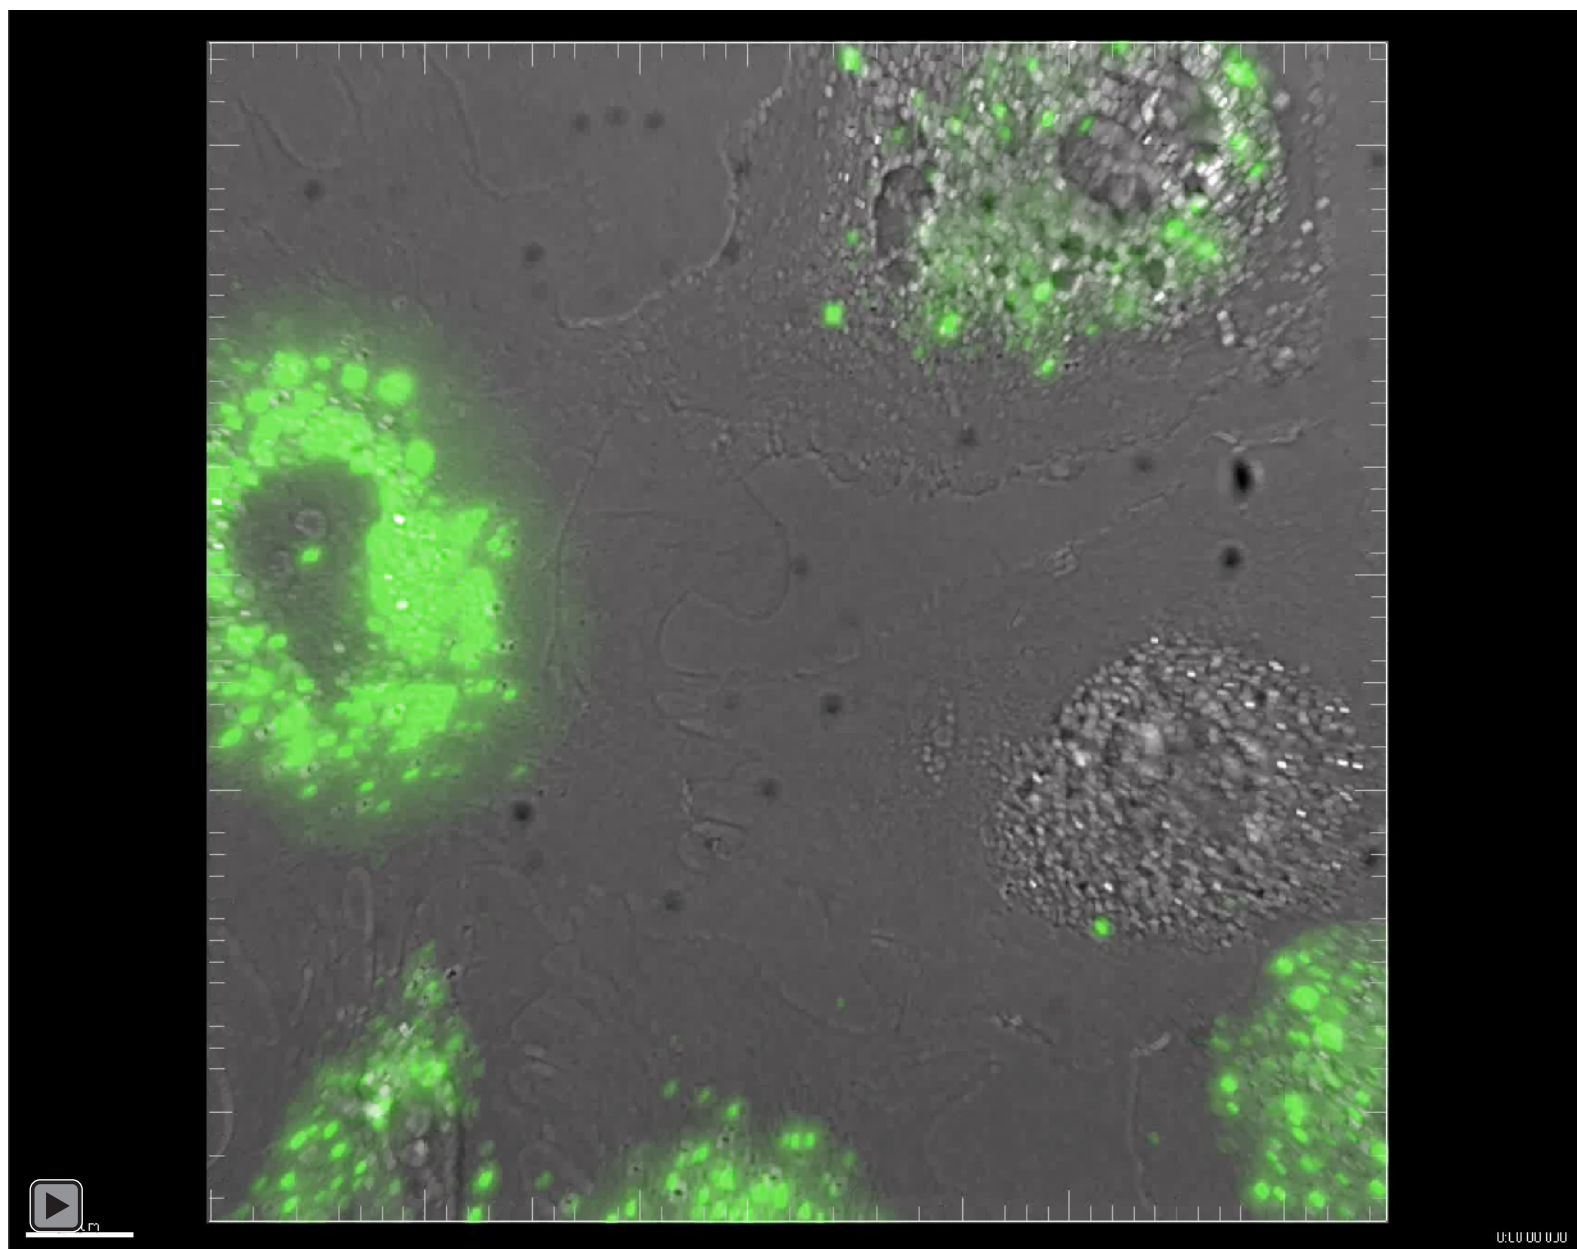

Figure S1c

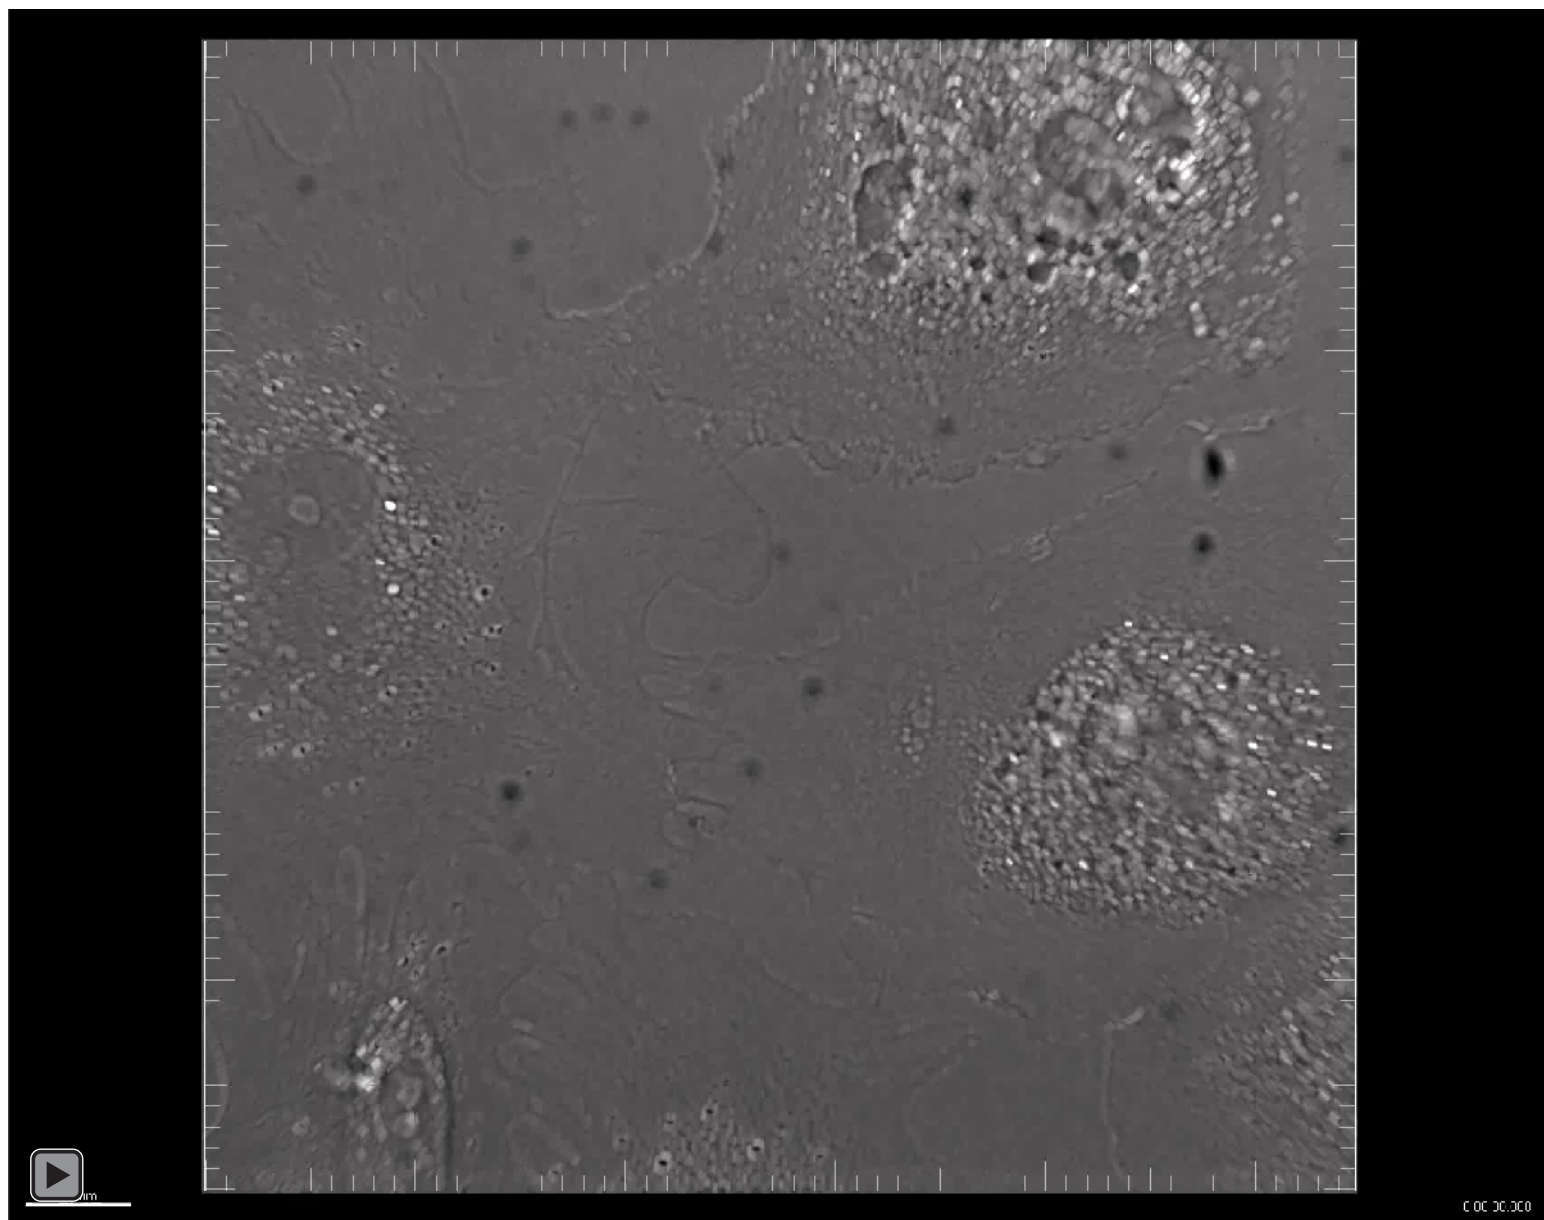



Figure S2a

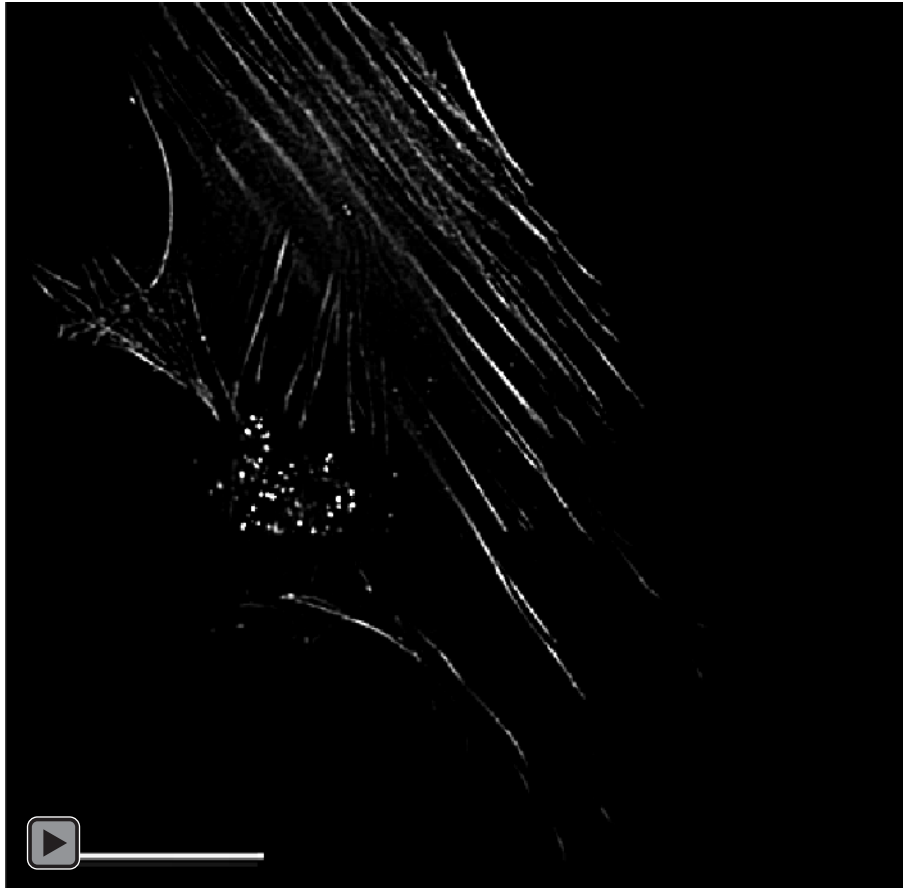

Figure S2b

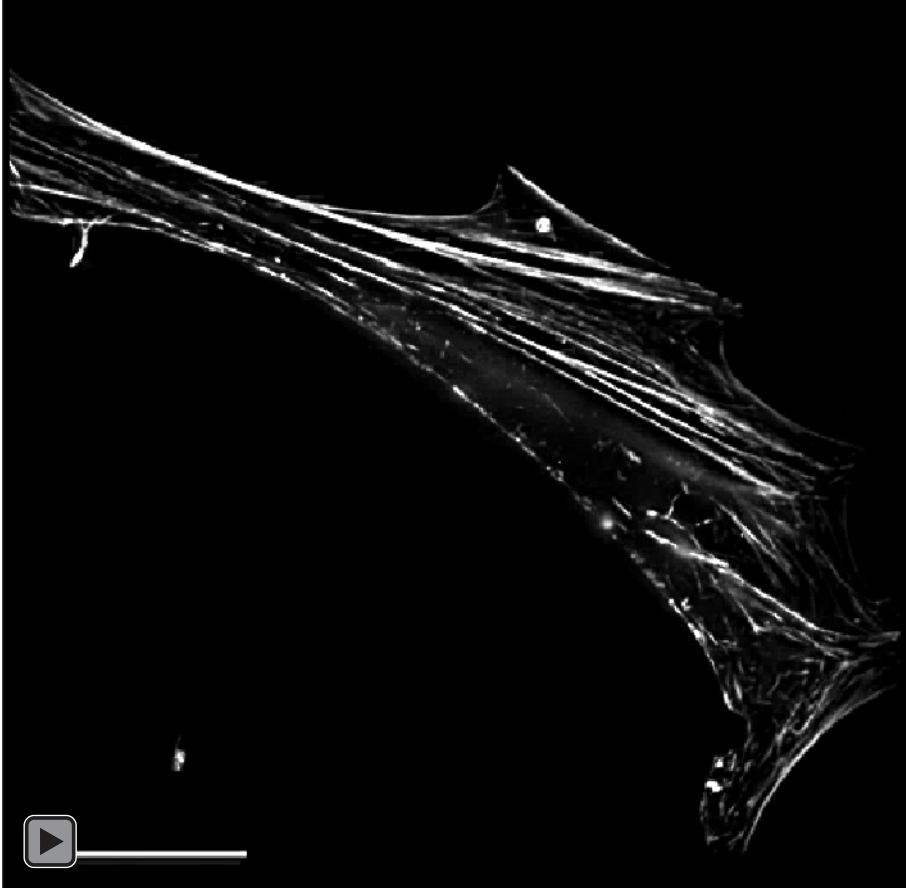

Figure S2c

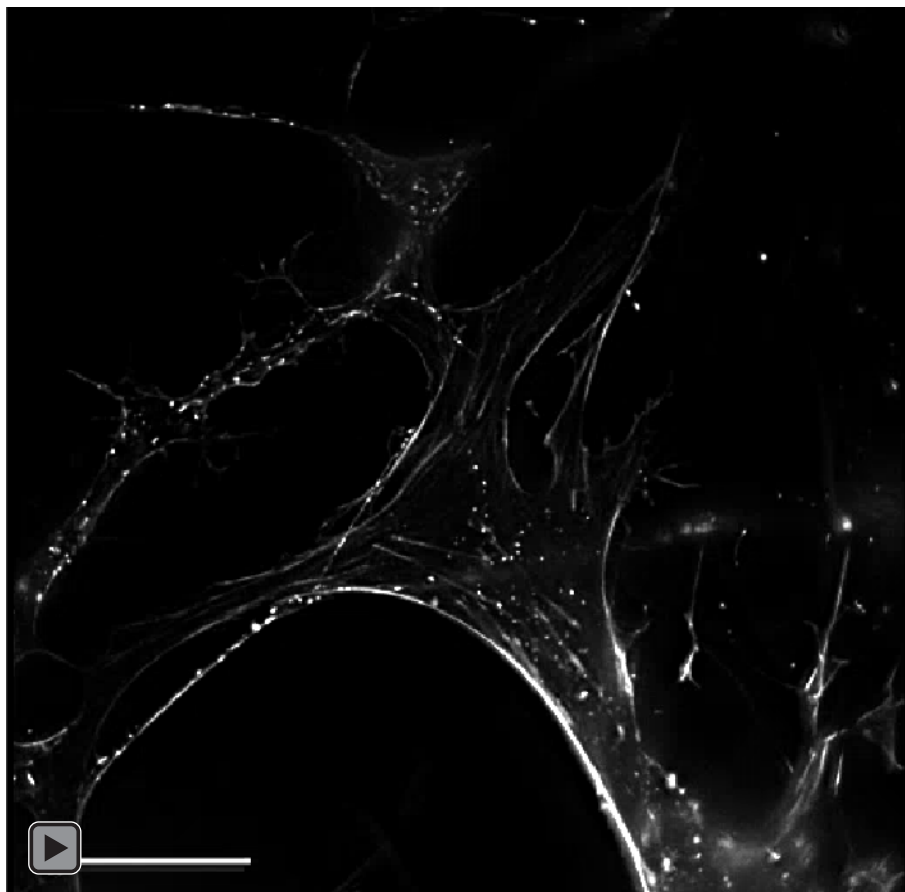

Supplement: IOVS-17-22732-s07.pdf [file IOVS-17-22732-s07.pdf]
